# Supplementary material for: The amount of DNA combined with TP53 mutations in liquid biopsy is associated with clinical outcome of renal cancer patients treated with immunotherapy and VEGFR-TKIs
Source: Springer Nature journal article supplement (doi:10.1186/s12967-022-03557-7), 2022-08-16
Supplement: MOESM1 [file 23370724]

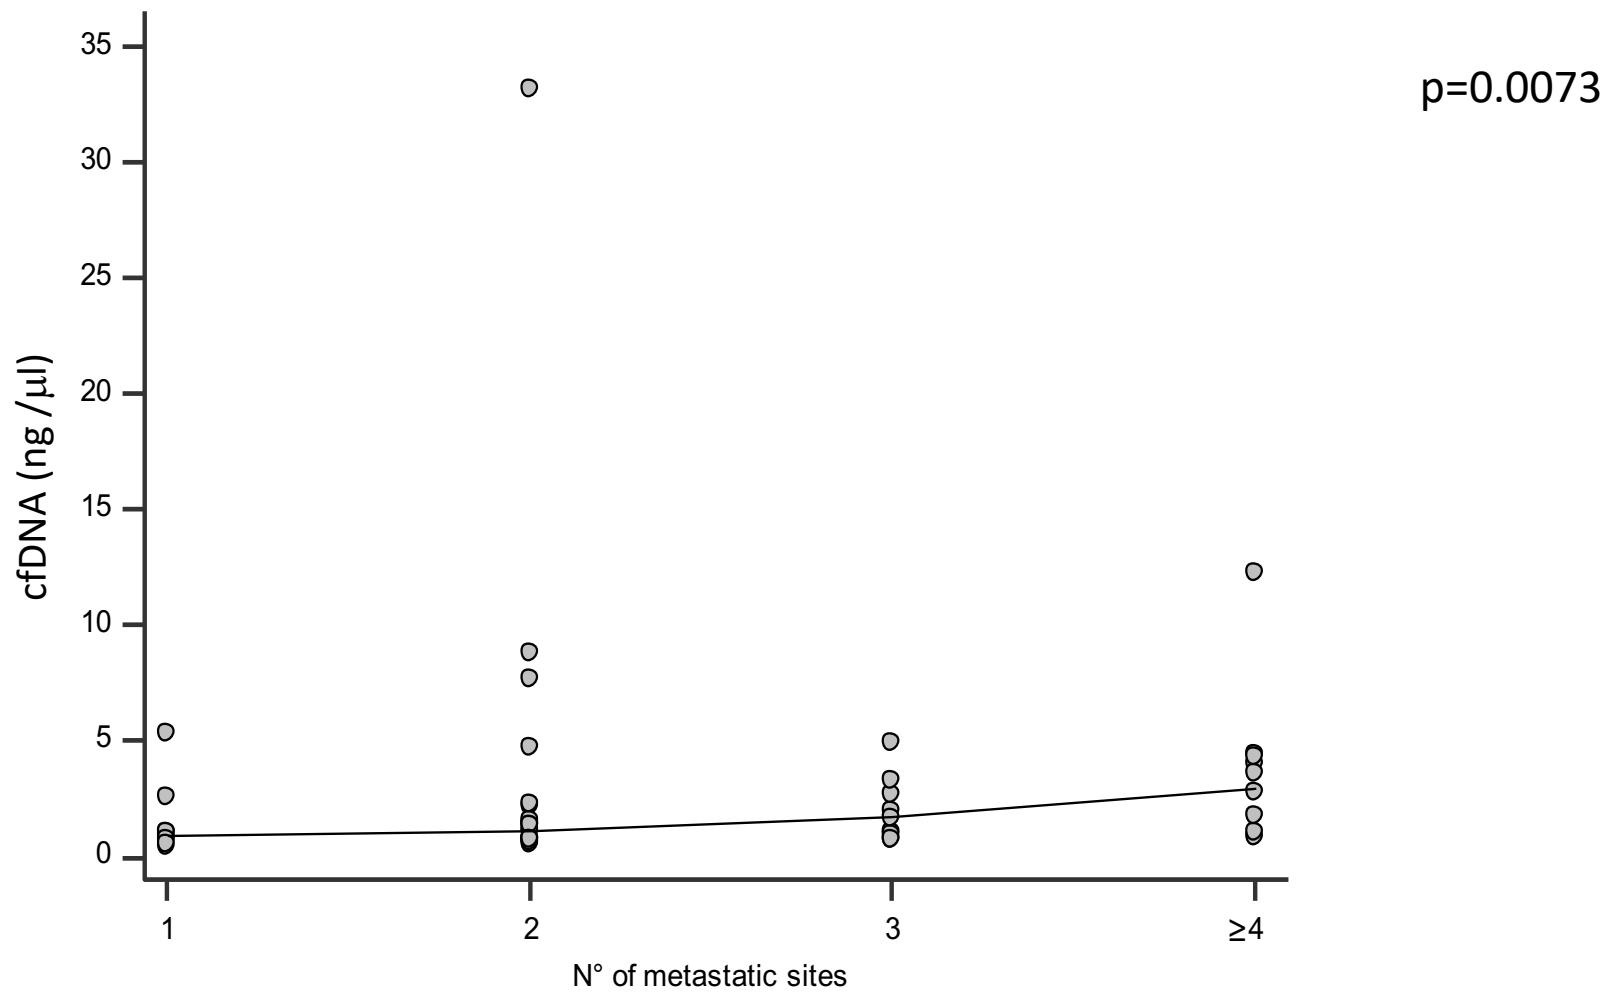

Figure S1
